## **Infantile Colic in Karachi: Exploring Maternal Awareness, Attitude and Management Approaches**

**SYED ROHAN ALI, MOOSA ABDUR RAQIB, KIRAN MEHTAB, MUNIR NAFEES, MALIK HAMDAN TAFHEEM**

### **Abstract:**

Infantile colic, characterized by severe abdominal pain and excessive crying, significantly impacts both infants and their parents. This study examined maternal awareness, knowledge, and attitudes towards colic, with a focus on socio-demographic factors. Conducted over eight months with a sample of 400 infants in Karachi, the research employed structured questionnaires and clinical evaluations. Statistical analysis revealed significant variations in colic occurrence based on age ( $p < 0.001$ ), maternal age ( $p = 0.005$ ), and educational background ( $p = 0.001$ ). Gender differences in digestive issues ( $p = 0.02$ ) and responses to crying based on gestational age were also notable. Additionally, educational status significantly affected perceptions of colic severity ( $p = 0.000$ ) and its impact on parental mental health ( $p = 0.03$ ). These findings highlight the necessity for tailored healthcare strategies that consider familial contexts and educational interventions to enhance understanding and management of infantile colic. Future research should explore the influence of gut microbiota and probiotics, aiming to develop empathetic and evidence-based approaches to improve outcomes for affected families.

### **Objective:**

This study aimed to provide updated insights into the epidemiology of infantile colic in Karachi, contributing to targeted healthcare interventions and policies aimed at alleviating colic-related distress among infants and their families in urban settings

### **Introduction:**

Infantile colic, marked by acute abdominal pain in infants, is mainly associated with gastrointestinal issues, though its exact cause is still unknown. The symptoms, including excessive crying and fussiness, cause significant distress for both infants and their parents. This study aims to evaluate mothers' awareness, knowledge, and attitudes towards infantile colic to better understand its causes. By examining socio-demographic factors such as maternal age and gender, the study seeks to identify potential differences in awareness. Understanding these maternal perspectives is essential, as they directly affect the child's well-being and overall family dynamics. This research aims to contribute to a thorough understanding and develop targeted interventions for managing infantile colic in Pakistan.

According to the recent definition by Hyman, colicky infants cry consistently during the evening at around the same time each day for at least one week, yet they remain otherwise healthy. Fortunately, infantile colic is typically short-lived: it usually starts at about two weeks of age and improves by the fourth month.<sup>1</sup> Various management strategies, including behavioral, dietary, pharmacological, and alternative interventions, are discussed. However, due to a lack of large, high-quality randomized controlled trials, none of these therapies are strongly recommended.<sup>2</sup>

The study also summarizes the behavioral and somatic consequences of infantile colic into childhood.

Although infantile colic usually does not lead to long-term problems, the persistent crying can cause parental frustration, postpartum depression, frequent doctor visits, and even child abuse. Colic undoubtedly induces stress within the family and diminishes the quality of life for both the family and the infant. Some evidence suggests that colicky babies may be at increased risk for recurrent abdominal pain in childhood or more frequent functional gastrointestinal disorders (FGIDs) and mood disorders in adulthood compared to healthy infants without colic. It has also been suggested that infants with colic have a higher risk of developing migraines. However, well-designed long-term, prospective observational studies are needed to confirm the few reports on potential links between infantile colic and future health outcomes.

### **Methods:**

A prospective cohort cross-sectional study was conducted on a sample of 400 infants, selected through non-probability purposive sampling from the National Institute of Child Health, Dr. Ruth K. M. Pfau, Civil Hospital Karachi, and Sindh Employees Social Security Institution (SESSI) Hospital Landhi Karachi. The study took place over an eight-month period from October 2023 to May 2024. Informed verbal consent was obtained from the parents, and a structured questionnaire was distributed among them. A pilot study was conducted to assess the validity of the questionnaire. To ensure representation from various socioeconomic backgrounds, a diverse sample of infants aged 0-12 months was enrolled from multiple healthcare facilities across Karachi using a stratified random sampling approach. The validated structured questionnaire collected comprehensive data on colic symptoms, maternal demographics, and household characteristics. Clinical examinations by healthcare providers further validated colic diagnoses and excluded other potential causes of infant distress. Statistical analysis was performed using SPSS Version 22, with a 95% confidence interval, a 5% margin of error, and a significance level set at 0.05. Ethical considerations included obtaining informed consent from participants and ensuring the confidentiality of collected data. This study aimed to provide updated insights into the epidemiology of infantile colic in Karachi, contributing to targeted healthcare interventions and policies aimed at alleviating colic-related distress among infants and their families in urban settings.

### **Result:**

The study examined infant abdominal colic across various factors, revealing significant findings. Differences in colic occurrence were significant across age ranges ( $p < 0.001$ ), with variability noted in reported frequencies for different age groups. Maternal age ( $p = 0.005$ ) and educational background ( $p = 0.001$ ) also significantly influenced colic reports. Family size showed significant variations in reported colic frequencies ( $p = 0.011$ ), while timing of colic varied significantly across age groups ( $p = 0.004$ ). Maternal education significantly affected perceptions of colic causes ( $p = 0.034$ ) and severity as a health issue ( $p = 0.000$ ).

Gender differences were significant in reported digestive issues ( $p = 0.02$ ) and occurrence of a high-pitched sound ( $p = 0.008$ ) among infants. Responses to infant crying varied significantly by

gestational age for home remedies ( $p = 0.001$ ), OTC medications ( $p = 0.001$ ), and seeking medical advice ( $p = 0.004$ ). Family size influenced opinions on awareness about colic ( $p = 0.001$ ). Birth weight showed significant associations with perceptions of colic severity ( $p = 0.035$ ).

Educational status significantly impacted perceptions of colic as a health issue ( $p = 0.000$ ) and its impact on parental mental health ( $p = 0.03$ ). Overall, these findings underscore the multifaceted influences on how colic is reported, perceived, and managed across different demographic factors.

## **Discussion:**

Infantile colic is a common yet challenging condition affecting infants worldwide, characterized by excessive crying and fussiness. Understanding its prevalence and management requires consideration of various demographic factors and parental perceptions, as highlighted by recent data analysis. Significant variations were observed in the reported occurrence of infant abdominal colic across different age ranges, with statistical significance noted in distributions among infants aged 0-6 months ( $p = 0.000$ ). This suggests that the manifestation of colic symptoms varies significantly during early infancy, potentially influenced by developmental stages and physiological changes in newborns.

Moreover, the frequency of colic pain reported by mothers varied notably based on the number of children in families ( $p = 0.011$ ). Families with fewer children tended to report higher frequencies of daily colic pain, reflecting potential differences in caregiving practices and family dynamics that may impact infant health outcomes. These findings underscore the need for tailored healthcare strategies that consider familial contexts and support mechanisms to alleviate the burden of colic on parents and caregivers.

Educational status emerged as a critical determinant of maternal perceptions regarding infantile colic. Mothers with higher educational attainment were more likely to perceive colic pain as a serious health issue compared to those with lower educational backgrounds ( $p = 0.000$ ). This disparity highlights the influence of maternal education on health literacy and the interpretation of infant health symptoms, indicating a need for targeted educational interventions to enhance understanding and management practices among all caregivers.

Furthermore, the association between birth weight and perceptions of colic pain severity was statistically significant ( $p = 0.035$ ). Parents of lighter infants tended to perceive colic as a more serious health concern compared to those with heavier infants, reflecting potential biases in parental perceptions related to infant health outcomes. Healthcare providers should address these biases through comprehensive education and support initiatives to ensure equitable care for all infants affected by colic, regardless of birth weight or perceived severity of symptoms.

In addition to demographic influences, the study also examined parental responses based on gestational birth age, revealing significant differences in treatment-seeking behaviors ( $p$ -values: home remedy use = 0.001, over-the-counter medication = 0.001, doctor's advice = 0.004). Term infants were more likely to receive home remedies and over-the-counter medications compared

to pre-term and post-term infants, suggesting variations in healthcare utilization based on gestational age and perceived vulnerability to colic-related discomforts.

The impact of infantile colic on parental mental health also varied significantly according to educational status ( $p = 0.03$ ). Parents with lower educational attainment reported a greater perceived impact of colic on their mental well-being compared to those with higher education levels, underscoring the need for targeted support services and mental health interventions for vulnerable caregivers. Addressing these disparities requires holistic approaches that integrate psychological support and coping strategies tailored to the unique needs of affected families.

In conclusion, the findings from this study provide valuable insights into the multifaceted nature of infantile colic, emphasizing the influence of demographic factors, parental perceptions, and healthcare-seeking behaviors on its prevalence and management. These insights underscore the importance of tailored interventions that consider familial contexts, educational backgrounds, and birth weight categories to optimize care and support for infants and their families. Future research should continue to explore these dynamics to enhance our understanding of colic etiology, treatment efficacy, and the long-term implications for child development and family well-being. By addressing these factors comprehensively, healthcare providers can improve outcomes and quality of life for infants and families affected by this common yet impactful condition.

## **Conclusion:**

Based on our analysis, effective management of infantile colic should integrate evidence-based strategies alongside empathetic support. Clinicians are advised to adopt a multifaceted approach, combining non-pharmacological interventions with parental education to address this common yet distressing condition. Non-pharmacological methods such as the "five S's" offer a safe and economical means to comfort colicky infants, prioritizing parental involvement and emotional reassurance without the risks associated with pharmacological treatments. It is crucial to emphasize the self-limiting nature of colic, typically resolving by four to six months of age, thereby alleviating parental anxiety through informed reassurance.

Further research is imperative to deepen our understanding and enhance treatment outcomes for infantile colic. Ongoing investigation into probiotics and their mechanisms, as well as the influence of gut microbiota on colic, represents promising avenues for future study. Tailored interventions targeting diverse infant populations should be explored to account for variability in symptoms and responsiveness to treatment. Rigorous placebo-controlled trials with larger sample sizes are essential to bolster the current evidence base, ensuring that clinical practices remain grounded in robust scientific findings and ultimately improving the management of infantile colic globally.

## **Declarations**

**Funding:** The authors received no extramural funding for the study.

## **Author Contributions:**

- **Concept & Design of Study:** Syed Rohan Ali
- **Drafting:** Moosa Abdur Raqib
- **Data Analysis:** Syed Rohan Ali
- **Revisiting Critically:** Syed Rohan Ali
- **Final Approval of Version:** Moosa abdur raqib and Kiran Mehtab

SYED ROHAN ALI, MOOSA ABDUR RAQIB, KIRAN MEHTAB, MUNIR NAFEES, MALIK HAMDAN TAFHEEM played crucial roles in refining the content, conducting a final round of editing, and presenting the article in a structured and balanced format, ensuring it was ready for publication.

**IRB Reference No:** IRB-65/04/ LCMD/08/2022

**Ethics Approval:** Ethics approval was granted by the IRB Committee LCMD, Karachi.

**Consent:** Verbal consent was obtained from the participants.

**Data Availability:** Data was collected by the investigator. If required, data and materials access can be granted.

**Conflict of Interest:** The study has no conflict of interest to declare by any author

## References:

1. Savino F, Ceratto S, De Marco A, Cordero di Montezemolo L. Looking for new treatments of Infantile Colic. *Italian journal of pediatrics*. 2014 Dec;40:1-6.
2. Zeevenhooven J, Browne PD, l'Hoir MP, de Weerth C, Benninga MA. Infant colic: mechanisms and management. *Nature reviews Gastroenterology & hepatology*. 2018 Aug;15(8):479-96.
3. Sarasu JM, Narang M, Shah D. Infantile colic: an update. *Indian pediatrics*. 2018 Nov;55:979-87.
4. Johnson JD, Cocker K, Chang E. Infantile colic: recognition and treatment. *American family physician*. 2015 Oct 1;92(7):577-82.
5. Daelemans S, Peeters L, Hauser B, Vandenplas Y. Recent advances in understanding and managing infantile colic. *F1000Research*. 2018;7
6. Mai T, Fatheree NY, Gleason W, Liu Y, Rhoads JM. Infantile colic: new insights into an old problem. *Gastroenterology Clinics*. 2018 Dec 1;47(4):829-44.
7. Hjern A, Lindblom K, Reuter A, Silfverdal SA. A systematic review of prevention and treatment of infantile colic. *Acta Paediatrica*. 2020 Sep;109(9):1733-44.
8. Camilleri M, Park SY, Scarpato E, Staiano A. Exploring hypotheses and rationale for causes of infantile colic. *Neurogastroenterology & Motility*. 2017 Feb;29(2):e12943.
9. Ong TG, Gordon M, Banks SS, Thomas MR, Akobeng AK. Probiotics to prevent infantile colic. *Cochrane Database of Systematic Reviews*. 2019(3).

10. Schreck Bird A, Gregory PJ, Jalloh MA, Risoldi Cochrane Z, Hein DJ. Probiotics for the treatment of infantile colic: a systematic review. *Journal of pharmacy practice*. 2017 Jun;30(3):366-74.
11. Didişen NA, Yavuz B, Gerçeker GÖ, Albayrak T, Atak M, Başbakkal DZ. Infantile colic in infants aged one-six months and the practices of mothers for colic.
12. Pärty A, Kalliomäki M, Salminen S, Isolauri E. Infantile colic is associated with low-grade systemic inflammation. *Journal of pediatric gastroenterology and nutrition*. 2017 May 1;64(5):691-5.
13. Egeli TU, Tufekci KU, Ural C, Durur DY, Erdogan FT, Cavdar Z, Genc S, Keskinoglu P, Duman N, Ozkan H. A new perspective on the pathogenesis of infantile colic: is infantile colic a biorhythm disorder?. *Journal of Pediatric Gastroenterology and Nutrition*. 2023 Aug 1;77(2):171-7.
14. Ellwood J, Draper-Rodi J, Carnes D. Comparison of common interventions for the treatment of infantile colic: a systematic review of reviews and guidelines. *BMJ open*. 2020 Feb 1;10(2):e035405.
15. Rhoads JM, Collins J, Fatheree NY, Hashmi SS, Taylor CM, Luo M, Hoang TK, Gleason WA, Van Arsdall MR, Navarro F, Liu Y. Infant colic represents gut inflammation and dysbiosis. *The Journal of pediatrics*. 2018 Dec 1;203:55-61.
16. Vandenas Y, Bacarea A, Marusteri M, Bacarea V, Constantin M, Manolache M. Efficacy and safety of APT198K for the treatment of infantile colic: a pilot study. *Journal of comparative effectiveness research*. 2017 Mar;6(2):137-44.
17. Sheidaei A, Abadi A, Zayeri F, Nahidi F, Gazerani N, Mansouri A. The effectiveness of massage therapy in the treatment of infantile colic symptoms: A randomized controlled trial. *Medical journal of the Islamic Republic of Iran*. 2016;30:351.
18. Izahrani TH, Anteet AM. Mothers' Awareness Towards Infantile Colic in Saudi Arabia. *Cureus*. 2023 Dec 11;15(12):e50364. doi: 10.7759/cureus.50364. PMID: 38213344
20. Mustafa M, Kariri TM, Majrabi RQ, Hufaysi AH, Abutalib Y, Khormi R, Alamri JM, Halawi M, Thurwi SA, Alhasani RA. Mothers' Perceptions and Attitudes About Infantile Colic in Jazan, Saudi Arabia. *Cureus*. 2023 Nov 3;15(11):e48210.PMID: 38050512; PMCID: PMC10693718.
21. Desprée ÅW, Småstuen MC, Glavin K, Lødrup Carlsen KC, Magi CAO, Söderhäll C, Hedlin G, Nordhagen L, Jonassen CM, Rehbinder EM, Nordlund B, Skjerven H. Infant colic and abdominal pain; associations with infant multimorbidity and maternal perceived stress up to 3 months postpartum-A cross-sectional/cohort study in the Prevent ADALL study. *J Clin Nurs*. 2023 Oct;32(19-20):7605-7617. Epub 2023 Jul 18.PMID: 37462350.
22. Banks JB, Rouster AS, Chee J, Doerr C. In: *StatPearls*. Treasure Island, FL: StatPearls Publishing; 2021. Colic (Nursing). 5. Mai T, Fatheree NY, Gleason W, Liu Y, Rhoads JM. Infantile Colic: New Insights into an Old Problem. *Gastroenterol Clin North Am*. 2018;47(4):829-844.
23. Chinawa JM, Ubesie AC, Adimora GN, Obu HA, Eke CB. Mothers' perception and management of abdominal colic in infants in Enugu, Nigeria. *Niger J Clin Pract*. 2013 Apr-Jun;16(2):169-73. PMID: 23563456.

24. Bolten, M. I. P., Fink, N. S. P., & Stadler, C. P. (2012). Maternal self-efficacy reduces the impact of prenatal stress on Infant's crying behavior. *The Journal of Pediatrics*, 161(1),104-109.
25. Al-Shehri H, Al-Mogheer BH, Al-Sawyan TH, Abualalaa AB, Jarrah OA, Jabari M, Al-Faris A. Assessment of maternal knowledge about infantile colic in Saudi Arabia. *Electron Physician*. 2016 Dec 25;8(12):3313-3317. PMID: 28163842;PMCID: PMC5279960.

#### TABLES:

#### **Summary of p-Values for Various Factors Related to Infantile Colic**

| <b>Factor</b>                                                    | <b>p-value</b> |
|------------------------------------------------------------------|----------------|
| Maternal Age Groups                                              | 0.005          |
| Maternal Educational Status                                      | 0.001          |
| Perceived Causes of Colic (Educational Status)                   | 0.034          |
| Gender and Reported Digestive Problems                           | 0.02           |
| Gender and Occurrence of High-Pitched Sound                      | 0.008          |
| Infant Abdominal Colic by Age Ranges                             | 0.000          |
| Frequency of Colic Pain by Age Group                             | 0.000          |
| Family Size and Colic Pain                                       | 0.011          |
| Timing of Colic Pain by Age Group                                | 0.004          |
| Infant Gender and Digestive Problems                             | 0.02           |
| Responses to Infant Crying by Gestational Age                    | 0.001          |
| Awareness of Infantile Colic Pain by Family Size                 | 0.001          |
| Perception of Colic Pain Severity by Birth Weight                | 0.035          |
| Perception of Colic Pain as a Health Issue by Educational Status | 0.000          |
| Impact of Colic on Parental Mental Health by Educational Status  | 0.03           |
| Gender and Occurrence of High-Pitched Sound in Infants           | 0.008          |

| <b>Potential Causes of Abdominal Colic</b> | <b>Frequency</b> | <b>Percent</b> | <b>Valid Percent</b> | <b>Cumulative Percent</b> |
|--------------------------------------------|------------------|----------------|----------------------|---------------------------|
| HUNGER                                     | 200              | 49.8           | 50.0                 | 50.8                      |
| Problem with digestion                     | 291              | 72.4           | 72.8                 | 72.8                      |
| Need for attention                         | 75               | 18.7           | 18.8                 | 18.8                      |
| Diaper issues                              | 66               | 16.4           | 16.5                 | 16.5                      |

| <b>Actions Taken When Infant Cries</b> | <b>Frequency</b> | <b>Percent</b> | <b>Valid Percent</b> | <b>Cumulative Percent</b> |
|----------------------------------------|------------------|----------------|----------------------|---------------------------|
| <b>Use home remedy</b>                 |                  |                |                      |                           |
| Use home remedy                        | 178              | 44.3           | 44.5                 | 44.8                      |
| <b>USE OTC</b>                         |                  |                |                      |                           |
| USE OTC                                | 194              | 48.3           | 48.5                 | 48.5                      |

**Go to doctor and seek advice**

Go to doctor and seek advice 143 35.6 35.8 35.8

**Abdominal massage**

Abdominal massage 136 33.8 34.0 34.0

| <b>Sources of Information Regarding Treatment</b> | <b>Frequency</b> | <b>Percent</b> | <b>Valid Percent</b> | <b>Cumulative Percent</b> |
|---------------------------------------------------|------------------|----------------|----------------------|---------------------------|
| <b>Internet</b>                                   |                  |                |                      |                           |
| Internet                                          | 62               | 15.4           | 15.5                 | 15.5                      |
| <b>Family Doctor</b>                              |                  |                |                      |                           |
| Family Doctor                                     | 162              | 40.3           | 40.5                 | 40.5                      |
| <b>Relatives</b>                                  |                  |                |                      |                           |
| Relatives                                         | 230              | 57.2           | 57.5                 | 57.5                      |
| <b>Hospital Visit</b>                             |                  |                |                      |                           |
| Hospital Visit                                    | 57               | 14.2           | 14.3                 | 14.3                      |

| <b>Impact of Infantile Colic on Family</b>             | <b>Frequency</b> | <b>Percent</b> | <b>Valid Percent</b> | <b>Cumulative Percent</b> |
|--------------------------------------------------------|------------------|----------------|----------------------|---------------------------|
| <b>Sleep Deprivation</b>                               |                  |                |                      |                           |
| Sleep Deprivation                                      | 201              | 50.0           | 50.3                 | 50.3                      |
| <b>Challenges with Breastfeeding</b>                   |                  |                |                      |                           |
| Challenges with Breastfeeding                          | 254              | 63.2           | 63.7                 | 63.7                      |
| <b>Diversion of Attention Away from Other Siblings</b> |                  |                |                      |                           |
| Diversion of Attention Away from Other Siblings        | 126              | 31.3           | 31.5                 | 31.5                      |
| <b>Strained Relationships Between Parents</b>          |                  |                |                      |                           |
| Strained Relationships Between Parents                 | 93               | 23.1           | 23.3                 | 23.3                      |
| <b>Impact on Parental Mental Health</b>                |                  |                |                      |                           |
| Impact on Parental Mental Health                       | 51               | 12.7           | 12.8                 | 12.8                      |
